# Supplementary material for: Role of RelA-synthesized (p)ppGpp in de novo acquisition of antibiotic resistance in E. coli
Source: Research Square preprint supplement (doi:10.21203/rs.3.rs-3404172/v1), 2023-10-20
Supplement: Supplementary file 1 [file 8441cb13866c4d6949bfa21a.xlsx]

## Sheet: Table S1
Table S1 Gene mutations in antibiotic resistant strains
Gene	Pop. Freq	Nt change	Mutation	Gene product
Amoxicillin resistants
WT
dcuC	0.14	c.368C>A	p.Ala123Asp	Anaerobic C4-dicarboxylate transporter
ompC	0.99	c.511C>T	p.Gln171*	Outer membrane porin C
cpxA	1	c.604C>T	p.Gln202*	Sensor histidine kinase CpxA
rpoC	1	c.1022A>C	p.Asn341Thr	DNA-directed RNA polymerase subunit beta
ampC	1	c.-34_-32delTAT	ampC attenuator	Beta-lactamase
	0.99	c.-73_-72insA	ampC -10 box
frdD	0.99	c.350_351insA	p.Thr118fs	Fumarate reductase subunit D
ΔrelA_1
ubiG	0.97	c.-127T>G	Up stream	Ubiquinone biosynthesis O-methyltransferase
rpoD	1	c.1334A>C	p.Asp445Ala	RNA polymerase sigma factor RpoD
wecA	0.12	c.468delT	p.Asp156fs	Undecaprenyl-phosphate alpha-N-acetylglucosaminyl 1-phosphate transferase
ampC	0.99	c.-38C>A	ampC attenuator	Beta-lactamase
	0.99	c.-70C>T	ampC -10 box
frdD	0.99	c.353C>T	p.Thr118Ile	Fumarate reductase subunit D
ytfP	1	n. 4437757_4438372 deletion		Gamma-glutamylcyclotransferase family protein YtfP
chpS				Antitoxin ChpS
ΔrelA_2
ftsI	0.55	c.1633G>A	p.Val545Ile	Cell division protein FtsL
dps	0.21	c.-134C>A	Up stream	DNA protection during starvation protein
ompC	0.33	c.110_114dupAAGTA	p.Asp39fs	Outer membrane porin C
ubiG	0.6	c.-127T>G	Up stream	Ubiquinone biosynthesis O-methyltransferase
rpoD	0.46	c.1334A>C	p.Asp445Ala	RNA polymerase, sigma 70 (sigma D) factor
rpoA	0.28	c.896C>A	p.Ser299Tyr	DNA-directed RNA polymerase subunit alpha
envZ	0.52	c.524C>T	p.Ala175Val	Sensor histidine kinase EnvZ
wecA	0.1	c.468delT	p.Asp156fs	Undecaprenyl-phosphate alpha-N-acetylglucosaminyl 1-phosphate transferase
cpxA	0.17	c.46_47insCGCTGG	p.Thr16_Leu17insLeuAla	Sensor histidine kinase CpxA
alsK	0.29	c.844T>C	p.Ser282Pro	D-allose kinase
ampC	0.92	c.-38C>A	ampC attenuator	Beta-lactamase
	0.92	c.-70C>T	ampC -10 box
frdD	0.92	c.353C>T	p.Thr118Ile	Fumarate reductase subunit D
ΔrpoS_1
ftsI	0.96	c.1537G>T	p.Ala513Ser	Peptidoglycan D,D-transpeptidase FtsI
ompX	0.96	c.-98G>A	Up stream	Outer membrane protein X
ydhQ	0.97	c.981C>T	p.Phe327Phe	Uncharacterized protein YdhQ
ompC	0.99	c.222C>A	p.Tyr74*	Outer membrane protein C
rpoA	0.94	c.769G>C	p.Val257Leu	DNA-directed RNA polymerase subunit alpha
envZ	0.99	c.722T>G	p.Val241Gly	Sensor histidine kinase EnvZ
ampC	0.99	c.-30G>T	ampC attenuator	Beta-lactamase
	0.99	c.-77G>T	Up stream
	0.99	c.-81dupT	Up stream
frdD	0.99	c.346G>T	p.Val116Phe	Fumarate reductase subunit D
	0.99	c.342dupT	p.Gly115fs
ΔrpoS_2
ftsI	1	c.931C>G	p.Pro311Ala	Peptidoglycan D,D-transpeptidase FtsI
	1	c.1633G>A	p.Val545Ile
acrB	1	c.1823C>T	p.Ser608Leu	Multidrug efflux pump subunit AcrB
mrdA	1	c.1757C>T	p.Ala586Val	Peptidoglycan D,D-transpeptidase MrdA
ompX	0.61	c.-99delT	Up stream	Outer membrane protein X
ompC	0.95	c.98dupA	p.Asp33fs	Outer membrane protein C
envZ	0.99	c.257T>G	p.Ile86Ser	Sensor histidine kinase EnvZ
cpxA	0.79	c.55_56insTGGTGTTGATGT	p.Leu19_Val20insValLeuMetLeu	Sensor histidine kinase CpxA
ampC	0.36	c.-37G>C	ampC attenuator	Beta-lactamase
	0.35	c.-40C>G	ampC attenuator
ΔhipA_1
acrB	0.5	c.405C>A	p.Ser135Arg	Multidrug efflux pump subunit AcrB
ompC	1	c.2305957~2306200 deletion	V10_N91del	Outer membrane protein C
rpoD	0.99	c.1334A>T	p.Asp445Val	RNA polymerase sigma factor RpoD
envZ	0.99	c.1189C>T	p.Arg397Cys	Sensor histidine kinase EnvZ
cpxA	1	c.46_51delACGCTG	p.Thr16_Leu17del	Sensor histidine kinase CpxA
rpoB	1	c.1406_1408delTAC	p.Val469_Arg470delinsGly	DNA-directed RNA polymerase subunit beta
soxR	0.17	c.446_447delTG	p.Leu149fs	Redox-sensitive transcriptional activator SoxR
ampC	0.98	c.-25C>A	ampC attenuator	Beta-lactamase
	0.95	c.-83dupA	Up stream
frdD	0.95	c.340dupA	p.Ile114fs	Fumarate reductase subunit D
ΔhipA_2
mppA	0.29	c.1500_1501insTTAC	p.Pro501fs	Periplasmic murein peptide-binding protein
ompC	0.66	c.400_402dupGAC	p.Asp134dup	Outer membrane porin C
rpoA	0.24	c.701_703dupTAC	p.Leu234dup	DNA-directed RNA polymerase subunit alpha
envZ	0.42	c.55_57delATC	p.Ile19del	Sensor histidine kinase EnvZ
	0.26	c.43A>C	p.Thr15Pro
cpxA	0.76	c.484G>A	p.Asp162Asn	Sensor histidine kinase CpxA
ghoT	0.38	c.101T>C	p.Leu34Ser	Toxin GhoT
	0.4	c.109G>A	p.Ala37Thr
	0.39	c.110C>G	p.Ala37Gly
ampC	0.99	c.-38C>G	ampC attenuator	Beta-lactamase
	0.96	c.-75dupC	Up stream
frdD	0.96	c.348dupC	p.Val117fs	Fumarate reductase subunit D
yjjK	0.28	c.392T>G	p.Ile131Ser	Energy-dependent translational throttle protein EttA
ΔhipB_1
acrB	0.99	c.1884C>A	p.Phe628Leu	Multidrug efflux pump subunit AcrB
comR	1	c.350G>T	p.Cys117Phe	HTH-type transcriptional repressor ComR
ptrA	0.84	c.2714_2723delTTGCTGATTT	p.Leu905fs	Protease 3
rpoD	0.99	c.1331C>T	p.Ala444Val	RNA polymerase sigma factor RpoD
tufA	0.87	c.544_547dupGACG	p.Ala183fs	Elongation factor Tu 1
groL	0.31	c.1611_1619dupTATGGGCGG	p.Gly540_Met541insMetGlyGly	Chaperonin GroEL
ampC	0.99	c.-38delC	ampC attenuator	Beta-lactamase
	0.99	c.-70C>T	ampC -10 box
frdD	0.99	c.353C>T	p.Thr118Ile	Fumarate reductase subunit D
ΔhipB_2
slyA	0.94	c.13_14insTC	p.Gly6fs	Transcriptional regulator SlyA
ompC	1	c.772C>T	p.Gln258*	Outer membrane porin C
envZ	0.99	c.524C>A	p.Ala175Glu	Sensor histidine kinase EnvZ
thiC	1	c.1449G>T	p.Ala483Ala	Phosphomethylpyrimidine synthase
ampC	0.99	c.-70C>T	ampC -10 box	Beta-lactamase
	0.99	c.-91T>A	ampC -30 box
frdD	0.99	c.353C>T	p.Thr118Ile	Fumarate reductase subunit D
	0.99	c.332T>A	p.Val111Asp
mscM	1	c.2812G>T	p.Asp938Tyr	Miniconductance mechanosensitive channel MscM
hfq	1	c.144C>A	p.Asn48Lys	RNA-binding protein Hfq
treC	1	c.785G>T	p.Arg262Leu	Trehalose-6-phosphate hydrolase
Enrofloxacin resistants
WT
acrA	1	c.-95delT	Up stream	Multidrug efflux pump subunit AcrA
dinG	0.32	c.76_83dupATTCCCCG	p.Ala29fs	ATP-dependent DNA helicase DinG
ybjG	0.4	c.243_244dupCC	p.Arg82fs	Putative undecaprenyl-diphosphatase YbjG
	0.37	c.73delT	p.Ser25fs
phoQ	1	c.694_696delGAA	p.Glu233del	Sensor protein PhoQ
prs	0.14	c.862_864dupCGT	p.Arg288dup	Ribose-phosphate pyrophosphokinase
hrpA	1	c.1418delG	p.Gly473fs	ATP-dependent RNA helicase HrpA
yoaA	1	c.1660delA	p.Met554fs	Probable ATP-dependent DNA helicase YoaA
gyrA	0.99	c.259G>A	p.Asp87Asn	DNA gyrase subunit A
	1	c.248C>T	p.Ser83Leu
ubiI	0.38	c.440delT	p.Leu147fs	2-octaprenylphenol hydroxylase
parC	1	c.240C>A	p.Ser80Arg	DNA topoisomerase 4 subunit A
parE	0.99	c.1309A>T	p.Ile437Phe	DNA topoisomerase 4 subunit B
rpoA	0.94	c.687_689dupAGC	p.Ala230dup	DNA-directed RNA polymerase subunit alpha
dppA	0.99	c.1563_1564insG	p.Asp522fs	Dipeptide-binding protein
fre	0.42	c.281delG	p.Gly94fs	NAD(P)H-flavin reductase
trkH	1	c.239T>A	p.Leu80Gln	Trk system potassium uptake protein TrkH
pepA	0.25	c.519delG	p.Ile174fs	Cytosol aminopeptidase
ΔrelA_1
acrR	0.99	c.-30T>C	Up stream	HTH-type transcriptional regulator AcrR
gyrA	1	c.241G>T	p.Gly81Cys	DNA gyrase subunit A
ΔrelA_2
acrR	1	c.232C>A	p.Gln78Lys	HTH-type transcriptional regulator AcrR
e14	1	n. 1191676-1206868 deletion		e14 prophage
ydfA	0.35	c.-89C>A	Up stream	Uncharacterized protein YdfA
gyrA	1	c.248C>T	p.Ser83Leu	DNA gyrase subunit A
fucK	0.91	c.121_123dupGCC	p.Ala41dup	L-fuculokinase
nanR	0.27	c.-23_-22insGATG	Up stream	HTH-type transcriptional repressor NanR
spoT	0.96	c.340_363dupGCGCAGGCCGAAAACTTTCGCAAG	p.Ala114_Lys121dup	Bifunctional (p)ppGpp synthase/hydrolase SpoT
ΔrpoS_1
acrR	1	c.356_363delTTGTCGGA	p.Phe119fs	HTH-type transcriptional regulator AcrR
dps	0.37	c.195G>T	p.Met65Ile	DNA protection during starvation protein
gyrA	1	c.259G>T	p.Asp87Tyr	DNA gyrase subunit A
frwA	0.42	c.766C>T	p.Gln256*	Multiphosphoryl transfer protein 2
soxR	1	c.-25_-24delAA	Up stream	Redox-sensitive transcriptional activator SoxR
e14	1	n. 1191676-1206868 deletion		e14 prophage
ΔrpoS_2
acrR	1	c.310_311dupGA	p.Arg105fs	HTH-type transcriptional regulator AcrR
rpsA	0.3	c.706_708dupAAC	p.Asn236dup	30S ribosomal protein S1
gyrA	1	c.248C>T	p.Ser83Leu	DNA gyrase subunit A
kefB	1	c.1105_1115delACGCCGTTGCT	p.Thr369fs	Glutathione-regulated potassium-efflux
soxR	1	c.410A>G	p.Asp137Gly	Redox-sensitive transcriptional activator SoxR
e14	1	n. 1191676-1206868 deletion		e14 prophage
ΔhipA_1
acrR	0.94	c.128_136delTTACGCGCG	p.Val43_Arg45del	HTH-type transcriptional regulator AcrR
dinG	0.1	c.296_305delTGCTGAAAAA	p.Leu99fs	ATP-dependent DNA helicase DinG
	0.1	c.1258delG	p.Ala420fs
sulA	0.96	c.-22A>G	Up stream	Cell division inhibitor SulA
pykF	1	c.1751302~1751615 deletion		Pyruvate kinase I
astB	0.94	c.1181T>A	p.Leu394His	N-succinylarginine dihydrolase
zwf	0.95	c.1017_1018dupAC	p.Arg340fs	Glucose-6-phosphate 1-dehydrogenase
gyrA	0.98	c.260A>G	p.Asp87Gly	DNA gyrase subunit A
	0.98	c.247T>G	p.Ser83Ala
speB	0.89	c.-395_-394insCT	Up stream	Galactose-proton symporter
parC	0.97	c.239G>T	p.Ser80Ile	DNA topoisomerase 4 subunit A
	0.97	c.236A>T	p.Asp79Val
gyrB	0.93	c.1391C>T	p.Ser464Phe	DNA gyrase subunit B
soxR	0.91	c.382_384delAGT	p.Ser128del	Redox-sensitive transcriptional activator SoxR
ΔhipA_2
acrR	1	c.232C>A	p.Gln78Lys	HTH-type transcriptional regulator AcrR
icd	0.44	c.1098C>T	p.His366His	Isocitrate dehydrogenase [NADP]
	0.42	c.1110C>T	p.Thr370Thr
	0.44	c.1123T>C	p.Leu375Leu
	0.42	c.1125A>G	p.Leu375Leu
	0.36	c.1155C>T	p.Asn385Asn
	0.37	c.1158G>C	p.Ala386Ala
	0.37	c.1161A>G	p.Lys387Lys
	0.32	c.1170C>T	p.Thr390Thr
gyrA	1	c.245A>G	p.Asp82Gly	DNA gyrase subunit A
hybO	0.99	c.385dupT	p.Tyr129fs	Hydrogenase-2 small chain
waaF	1	c.749C>A	p.Thr250Lys	ADP-heptose--LPS heptosyltransferase 2
ΔhipB_1
acrR	1	c.306_309delAGAA	p.Glu103fs	HTH-type transcriptional regulator AcrR
e14	1	n. 1191676-1206868 deletion		e14 prophage
gyrA	0.99	c.259G>T	p.Asp87Tyr	DNA gyrase subunit A
lepA	0.17	c.1249A>T	p.Asn417Tyr	Elongation factor 4
soxR	1	c.378_380delGCG	p.Arg127del	Redox-sensitive transcriptional activator SoxR
ΔhipB_2
acrR	0.97	c.310dupG	p.Glu104fs	HTH-type transcriptional regulator AcrR
e14	1	n. 1191676-1206868 deletion		e14 prophage
gyrA	1	c.260A>G	p.Asp87Gly	DNA gyrase subunit A
	1	c.248C>T	p.Ser83Leu
purL	0.87	c.3205G>T	p.Asp1069Tyr	Phosphoribosylformylglycinamidine synthase
parC	1	c.833A>T	p.Lys278Met	DNA topoisomerase 4 subunit A
	0.99	c.832A>T	p.Lys278*
	1	c.831A>T	p.Lys277Asn
	1	c.239G>T	p.Ser80Ile
parE	1	c.1378G>A	p.Glu460Lys	DNA topoisomerase 4 subunit B
gyrB	1	c.1391C>T	p.Ser464Phe	DNA gyrase subunit B
oxyR	0.13	c.637delG	p.Ala213fs	Hydrogen peroxide-inducible genes activator
	0.1	c.861_862dupGG	p.Ala288fs
Kanamycin resistants
WT
sbmA	1	c.17delT	p.Phe6fs	Peptide antibiotic transporter SbmA
kdpD	0.63	c.1977_1985delACGTGAACA	p.Arg660_Gln662del	Sensor protein KdpD
oppD	1	c.606delC	p.Val203fs	Oligopeptide transport ATP-binding protein OppD
lsrK	1	c.-48G>A	Up stream	Autoinducer-2 kinase
yfcS	0.99	c.179T>A	p.Leu60Gln	Probable fimbrial chaperone YfcS
acrD	1	c.3003T>G	p.Gly1001Gly	Probable aminoglycoside efflux pump
fusA	1	c.1178C>T	p.Thr393Ile	Elongation factor G
atpG	0.98	c.735_736insGCGAT	p.Lys248fs	ATP synthase gamma chain
ΔrelA_1
sbmA	0.99	c.159G>A	p.Trp53*	Peptide antibiotic transporter SbmA
fusA	0.98	c.1178C>T	p.Thr393Ile	Elongation factor G
ΔrelA_2
oppD	0.9	c.208delA	p.Met70fs	Oligopeptide transport ATP-binding protein OppD
pgsA	0.63	c.224T>A	p.Val75Glu	CDP-diacylglycerol--glycerol-3-phosphate 3-phosphatidyltransferase
nuoM	0.93	c.278_279delTG	p.Leu93fs	NADH-quinone oxidoreductase subunit M
recB	0.1	c.722G>A	p.Gly241Asp	RecBCD enzyme subunit RecB
fusA	1	c.1178C>T	p.Thr393Ile	Elongation factor G
spoT	1	c.943G>A	p.Gly315Ser	Bifunctional (p)ppGpp synthase/hydrolase SpoT
trkH	0.14	c.239T>A	p.Leu80Gln	Trk system potassium uptake protein TrkH
ΔrpoS_1
sbmA	1	c.62T>A	p.Leu21*	Peptide antibiotic transporter SbmA
oppB	0.99	c.496delT	p.Trp166fs	Oligopeptide transport system permease protein OppB
rplF	0.18	c.470A>G	p.Tyr157Cys	50S ribosomal protein L6
fusA	1	c.436C>T	p.Arg146Cys	Elongation factor G
ubiE	0.97	c.323_330dupTGCGTAAT	p.Ile111fs	Ubiquinone/menaquinone biosynthesis C-methyltransferase UbiE
fre	0.99	c.425_429delAAGAG	p.Glu142fs	NAD(P)H-flavin reductase
rplL	0.5	c.131_148dupGCCCGGTTGAAGCTGCTG	p.Gly44_Ala49dup	50S ribosomal protein L7/L12
	0.17	c.122T>A	p.Val41Glu
ΔrpoS_2
sbmA	1	c.766G>T	p.Gly256*	Peptide antibiotic transporter SbmA
dxs	0.71	c.935_936insGAAAAGTAGCGGCGGTTTGCC	p.Pro312_Lys313insLysSerSerGlyGlyLeuPro	1-deoxy-D-xylulose-5-phosphate synthase
	0.18	c.928T>G	p.Cys310Gly
oppD	0.93	c.660dupC	p.Ala221fs	Oligopeptide transport ATP-binding protein OppD
yejE	0.63	c.453delT	p.Leu152fs	Inner membrane ABC transporter permease protein YejE
fusA	0.99	c.175C>T	p.Arg59Cys	Elongation factor G
cpxA	0.86	c.733G>T	p.Asp245Tyr	Sensor histidine kinase CpxA
ubiA	0.98	c.415A>C	p.Thr139Pro	4-hydroxybenzoate octaprenyltransferase
ΔhipA_1
ilvI	0.84	c.-44_-43insAA	Up stream	Acetolactate synthase isozyme 3 large subunit
sbmA	0.4	c.54_55insACC	p.Val18_Trp19insThr	Peptide antibiotic transporter SbmA
cyoC	0.16	c.223_224delTT	p.Leu75fs	Cytochrome bo(3) ubiquinol oxidase subunit 3
cydA	0.15	c.1342C>A	p.Arg448Ser	Cytochrome bd-I ubiquinol oxidase subunit 1
oppF	0.92	c.604C>A	p.Gln202Lys	Oligopeptide transport ATP-binding protein OppF
yejF	0.62	c.935_948delGTGAAACACTGGGT	p.Gly312fs	Uncharacterized ABC transporter ATP-binding protein YejF
arcB	0.93	c.352G>A	p.Glu118Lys	Aerobic respiration control sensor protein ArcB
fusA	1	c.1829C>T	p.Pro610Leu	Elongation factor G
atpG	0.75	c.718_720dupCAG	p.Gln240dup	ATP synthase gamma chain
ΔhipA_2
sbmA	0.75	c.940_948delTTTCACTAT	p.Phe314_Tyr316del	Peptide antibiotic transporter SbmA
oppF	0.99	c.610_612delGTC	p.Val204del	Oligopeptide transport ATP-binding protein OppF
fusA	0.99	c.1178C>T	p.Thr393Ile	Elongation factor G
ΔhipB_1
sbmA	0.96	c.619_628delGTCAGTTTTA	p.Val207fs	Peptide antibiotic transporter SbmA
brnQ	0.99	c.476delT	p.Leu159fs	Branched-chain amino acid transport system 2 carrier protein
mrdA	0.13	c.1115A>T	p.Lys372Ile	Peptidoglycan D,D-transpeptidase MrdA
kdpD	1	c.1379A>T	p.Asp460Val	Sensor protein KdpD
oppB	0.36	c.586T>C	p.Ser196Pro	Oligopeptide transport system permease protein OppB
	0.35	c.596A>G	p.Glu199Gly
fusA	0.99	c.362C>G	p.Pro121Arg	Elongation factor G
atpD	0.19	c.33C>T	p.Gly11Gly	ATP synthase subunit beta
atpG	0.92	c.725_726insCCGTCCAGCGAGCAGGCCGC	p.Met244fs	ATP synthase gamma chain
atpH	0.16	c.437C>T	p.Ser146Phe	ATP synthase subunit delta
	0.14	c.99G>T	p.Ala33Ala
atpB	0.39	c.782_783insCGTCTATCTGTCGATGGAT	p.Ala267fs	ATP synthase subunit a
fre	1	c.290G>T	p.Trp97Leu	NAD(P)H-flavin reductase
ΔhipB_2
oppB	0.99	c.3delG	p.Leu2fs	Oligopeptide transport system permease protein OppB
pgsA	1	c.17C>T	p.Pro6Leu	CDP-diacylglycerol--glycerol-3-phosphate 3-phosphatidyltransferase
fusA	1	c.1178C>T	p.Thr393Ile	Elongation factor G
atpG	1	c.718_735delCAGGCCGCCCGTATGGTG	p.Gln240_Val245del	ATP synthase gamma chain
Tetracycline resistants
WT
decR	0.8	c.115C>T	p.Leu39Leu	DNA-binding transcriptional activator DecR
rpsJ	1	c.169G>C	p.Val57Leu	30S ribosomal protein S10
envZ	0.13	c.514_515insT	p.Gly173fs	Sensor histidine kinase EnvZ
	0.88	c.499_500insTTATGCTATTGGCGA	p.Ile167_Met168insMetLeuLeuAlaIle
hemY	0.68	c.614C>A	p.Ser205*	Protein HemY
	0.68	c.613T>A	p.Ser205Thr
	0.63	c.611delG	p.Ser204fs
	0.49	c.606A>G	p.Ala202Ala
	0.28	c.606_607insCGCCACGGCG	p.Trp203fs
	0.14	c.601G>T	p.Gly201Cys
	0.29	c.601G>C	p.Gly201Arg
	0.35	c.559C>G	p.Pro187Ala
	0.66	c.549G>C	p.Thr183Thr
	0.67	c.548C>T	p.Thr183Met
	0.72	c.544G>A	p.Val182Ile
	0.75	c.543A>T	p.Glu181Asp
ΔrelA_1
mlaA	1	c.129_134delCTTCAA	p.Phe44_Asn45del	Intermembrane phospholipid transport system lipoprotein MlaA
spoT	0.99	c.943G>A	p.Gly315Ser	Bifunctional (p)ppGpp synthase/hydrolase SpoT
ΔrelA_2
ompF	1	c.673C>T	p.Gln225*	Outer membrane porin F
mlaA	1	c.129_134delCTTCAA	p.Phe44_Asn45del	Intermembrane phospholipid transport system lipoprotein MlaA
rpsJ	1	c.169G>C	p.Val57Leu	30S ribosomal protein S10
spoT	1	c.943G>A	p.Gly315Ser	Bifunctional (p)ppGpp synthase/hydrolase SpoT
e14	1	n. 1191676-1206868 deletion		e14 prophage
ΔrpoS_1
acrR	1	c.92C>A	p.Ser31Tyr	HTH-type transcriptional regulator AcrR
ybiT	1	c.324G>A	p.Met108Ile	Probable ATP-binding protein YbiT
ΔrpoS_2
pepD	1	c.*24C>A	Down stream	Cytosol non-specific dipeptidase
lon	0.38	c.-102G>T	Up stream	Lon protease
	0.16	c.-91delC
	0.16	c.-42T>G
decR	0.95	c.-25_-24insA	Up stream	DNA-binding transcriptional activator DecR
marR	1	c.251T>A	p.Val84Glu	Multiple antibiotic resistance protein MarR
mprA	0.42	c.160_161insCCA	p.Ile53_Asn54insThr	Transcriptional repressor MprA
rpoD	1	c.1375A>G	p.Thr459Ala	RNA polymerase sigma factor RpoD
ΔhipA_1
acrB	0.99	c.1706A>T	p.Gln569Leu	Multidrug efflux pump subunit AcrB
acrR	0.92	c.-41delA	Up stream	HTH-type transcriptional regulator AcrR
fadR	0.23	c.488_495delTGATTCTT	p.Leu163fs	Fatty acid metabolism regulator protein
mlaA	0.99	c.129_134delCTTCAA	p.Phe44_Asn45del	Intermembrane phospholipid transport system lipoprotein MlaA
rpoC	0.92	c.644_661delAAAAGCTGACCAAGCGTA	p.Lys215_Arg220del	DNA-directed RNA polymerase subunit beta'
ΔhipA_2
acrB	0.99	c.1719G>C	p.Met573Ile	Multidrug efflux pump subunit AcrB
acrR	0.99	c.92C>A	p.Ser31Tyr	HTH-type transcriptional regulator AcrR
mlaA	1	c.129_134delCTTCAA	p.Phe44_Asn45del	Intermembrane phospholipid transport system lipoprotein MlaA
rseB	0.71	c.510_511insG	p.Asp171fs	Sigma-E factor regulatory protein RseB
rpoB	0.94	c.86_91dupCTATCC	p.Ile30_Gln31insProIle	DNA-directed RNA polymerase subunit beta
ΔhipB_1
decR	1	c.115C>T	p.Leu39Leu	DNA-binding transcriptional activator DecR
rpsJ	1	c.169G>C	p.Val57Leu	30S ribosomal protein S10
envZ	1	c.262C>T	p.Leu88Phe	Sensor histidine kinase EnvZ
rob	1	c.737_739delCGT	p.Thr246_Cys247delinsSer	Right origin-binding protein
ΔhipB_2
ompF	0.99	c.712_718dupACTGGTC	p.Leu240fs	Outer membrane porin F
rpsJ	1	c.169G>C	p.Val57Leu	30S ribosomal protein S10
